# Supplementary material for: On the association of frustrated Lewis pairs in ionic liquids: a molecular dynamics simulation study
Source: Royal Society of Chemistry journal article supplement (doi:10.1039/d1cp00479d), 2021-01-01
Supplement: d1cp00479d1.pdf [file d1cp00479d1.pdf]

## Supporting Information

### **On the association of frustrated Lewis pairs in ionic liquids: a molecular dynamics simulation study**

Xiaoqing Liu,<sup>a†\*</sup> Xiaojing Wang,<sup>a†</sup> Yao Li,<sup>b</sup> Tianhao Yu,<sup>b</sup> Weizhen Zhao,<sup>b</sup> Lei Liu,<sup>b\*</sup>

<sup>a</sup> School of Environment and Safety Engineering, North University of China, Taiyuan, 030051, PR China

<sup>b</sup> Beijing Key Laboratory of Ionic Liquids Clean Process, Key Laboratory of Green Process and Engineering, Institute of Process Engineering, Chinese Academy of Sciences, Beijing 100190, P.R. China

Corresponding authors:

Xiaoqing Liu, [xiaoqing@nuc.edu.cn](mailto:xiaoqing@nuc.edu.cn);

Lei Liu, [liulei@ipe.ac.cn](mailto:liulei@ipe.ac.cn); [liulei3039@gmail.com](mailto:liulei3039@gmail.com);

† These authors contributed equally to the work

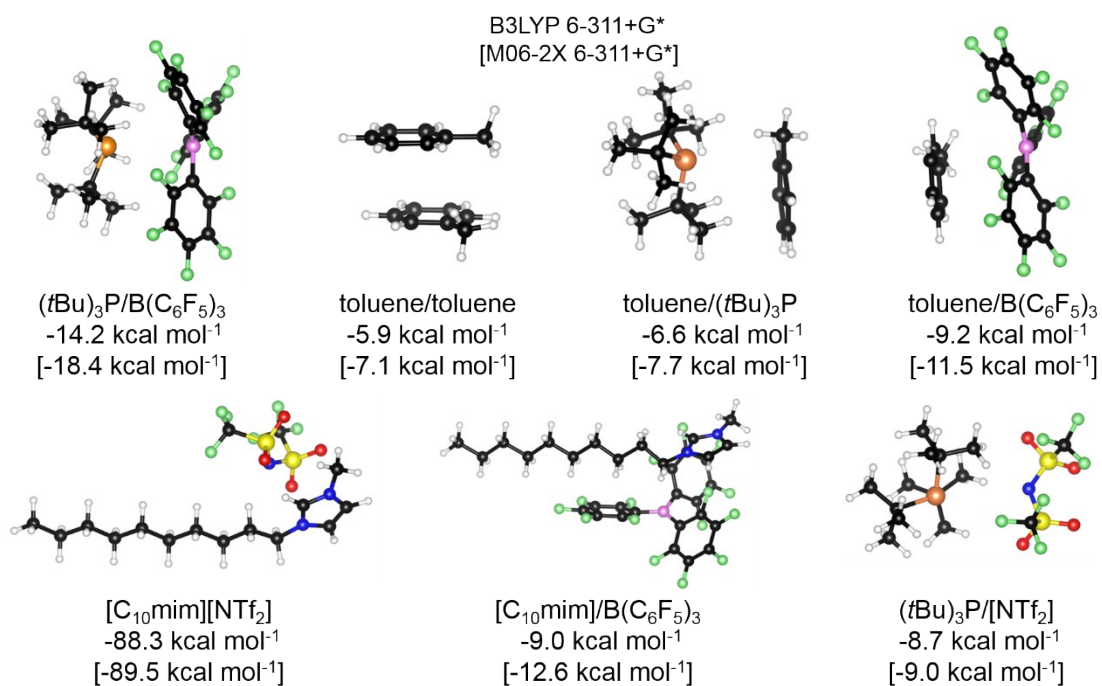

**Figure S1.** The DFT optimized structures and their interaction energies. Color legend: P brown, B pink, F green, N blue, O red, S yellow, C black, H white.

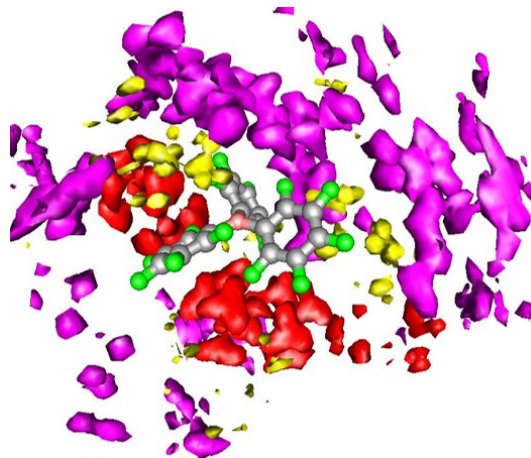

**Figure S2.** Computed SDFs for (tBu)<sub>3</sub>P/B(C<sub>6</sub>F<sub>5</sub>)<sub>3</sub> in [C<sub>6</sub>mim][CTf<sub>3</sub>] with B(C<sub>6</sub>F<sub>5</sub>)<sub>3</sub> as the central molecule. Color legend: (tBu)<sub>3</sub>P red, [C<sub>6</sub>mim]<sup>+</sup> pink, and [CTf<sub>3</sub>]<sup>-</sup> yellow. The isosurface values are 23.0 for [C<sub>6</sub>mim]<sup>+</sup>, 45.0 for [CTf<sub>3</sub>]<sup>-</sup> and 100.0 for (tBu)<sub>3</sub>P.

**Cartesian coordinates** (The DFT optimized structures at B3LYP-D3/6-31G\* and their energies at B3LYP-D3/6-311+G\* in hartree).

**(*t*Bu)<sub>3</sub>P**

-815.086488805

|   |           |           |           |
|---|-----------|-----------|-----------|
| P | -0.000234 | 0.000943  | -0.721157 |
| C | -0.395658 | -1.753574 | -0.004480 |
| C | -1.321988 | 1.219343  | -0.003365 |
| C | 1.717016  | 0.533957  | -0.003918 |
| C | -0.842097 | 2.669032  | -0.215745 |
| H | -1.675397 | 3.351299  | -0.002257 |
| H | -0.020901 | 2.947481  | 0.446860  |
| H | -0.530171 | 2.845337  | -1.250289 |
| C | -1.715079 | 1.051770  | 1.473393  |
| H | -2.440596 | 1.830245  | 1.748949  |
| H | -2.189443 | 0.088108  | 1.670078  |
| H | -0.858584 | 1.149062  | 2.144327  |
| C | -2.581543 | 1.074988  | -0.888283 |
| H | -3.309798 | 1.847378  | -0.606109 |
| H | -2.334821 | 1.213639  | -1.945942 |
| H | -3.075521 | 0.109552  | -0.783400 |
| C | 2.220688  | 1.697583  | -0.889136 |
| H | 1.625249  | 2.604471  | -0.788853 |
| H | 3.250827  | 1.948823  | -0.602436 |
| H | 2.224422  | 1.412036  | -1.946088 |
| C | 2.733176  | -0.606137 | -0.217108 |
| H | 3.740904  | -0.222978 | -0.009198 |
| H | 2.568268  | -1.453780 | 0.450327  |
| H | 2.725764  | -0.969029 | -1.250030 |
| C | 1.772019  | 0.958185  | 1.473396  |
| H | 2.809942  | 1.196230  | 1.746018  |
| H | 1.176568  | 1.851737  | 1.672848  |
| H | 1.429167  | 0.168028  | 2.145098  |
| C | -0.055210 | -2.011057 | 1.472804  |
| H | -0.371215 | -3.026936 | 1.749304  |
| H | 1.016783  | -1.945936 | 1.669596  |
| H | -0.563474 | -1.315220 | 2.144019  |
| C | 0.359856  | -2.772347 | -0.888625 |
| H | 1.442507  | -2.718190 | -0.779385 |
| H | 0.052887  | -3.789257 | -0.609088 |
| H | 0.119882  | -2.626029 | -1.946752 |
| C | -1.891300 | -2.063426 | -0.216388 |
| H | -2.542424 | -1.494618 | 0.449673  |
| H | -2.202564 | -1.878503 | -1.249669 |
| H | -2.064041 | -3.126995 | -0.005508 |

**B(C<sub>6</sub>F<sub>5</sub>)<sub>3</sub>**

-2209.01140634

|   |           |           |           |
|---|-----------|-----------|-----------|
| B | -0.000612 | 0.001105  | -0.000003 |
| C | -1.513606 | 0.389522  | 0.000390  |
| C | -2.475945 | -0.354588 | 0.697824  |
| C | -3.823955 | -0.019526 | 0.717579  |
| C | -4.258562 | 1.093625  | 0.001389  |
| C | -3.342302 | 1.860067  | -0.715542 |
| C | -1.999446 | 1.504857  | -0.696945 |
| F | -2.110863 | -1.430566 | 1.413442  |
| F | -4.702156 | -0.750038 | 1.411208  |
| F | -5.548245 | 1.424406  | 0.001753  |
| F | -3.761011 | 2.923244  | -1.408662 |

|   |           |           |           |
|---|-----------|-----------|-----------|
| F | -1.162219 | 2.271963  | -1.413551 |
| C | 0.418970  | -1.503490 | 0.000299  |
| C | 1.542727  | -1.965906 | 0.699747  |
| C | 1.926075  | -3.300927 | 0.718721  |
| C | 1.180307  | -4.232763 | 0.000076  |
| C | 0.060028  | -3.821408 | -0.718720 |
| C | -0.303292 | -2.480701 | -0.699345 |
| F | 2.290169  | -1.112621 | 1.418196  |
| F | -1.384141 | -2.137535 | -1.418406 |
| F | -0.649558 | -4.714719 | -1.414740 |
| F | 1.538227  | -5.515120 | -0.000032 |
| F | 2.996003  | -3.697717 | 1.414271  |
| C | 1.093019  | 1.116268  | -0.001103 |
| C | 0.931332  | 2.322905  | 0.694995  |
| C | 1.897400  | 3.320976  | 0.714244  |
| C | 3.078934  | 3.137468  | -0.000718 |
| C | 3.283422  | 1.959346  | -0.715591 |
| C | 2.302437  | 0.975975  | -0.696766 |
| F | -0.182766 | 2.547602  | 1.409945  |
| F | 1.706188  | 4.448079  | 1.406339  |
| F | 4.012026  | 4.087101  | -0.000688 |
| F | 4.413779  | 1.788072  | -1.407591 |
| F | 2.546545  | -0.133896 | -1.411839 |

**toluene**

-271.650167723

|   |           |           |           |
|---|-----------|-----------|-----------|
| C | -0.004393 | 0.913221  | 0.000000  |
| C | -0.007715 | 0.194849  | 1.202180  |
| C | -0.007715 | -1.200207 | 1.205318  |
| C | -0.007079 | -1.903848 | 0.000000  |
| C | -0.007715 | -1.200207 | -1.205318 |
| C | -0.007715 | 0.194849  | -1.202180 |
| H | -0.012031 | 0.735787  | 2.145903  |
| H | -0.012727 | -1.737482 | 2.150048  |
| H | -0.010453 | -2.990315 | 0.000000  |
| H | -0.012727 | -1.737482 | -2.150048 |
| H | -0.012031 | 0.735787  | -2.145903 |
| C | 0.029934  | 2.422703  | 0.000000  |
| H | -0.464172 | 2.834779  | 0.886205  |
| H | 1.062706  | 2.795987  | 0.000000  |
| H | -0.464172 | 2.834779  | -0.886205 |

**[C<sub>10</sub>min]+**

-659.263907193

|   |           |           |           |
|---|-----------|-----------|-----------|
| N | -5.709815 | 0.866907  | -0.000009 |
| C | -4.379876 | 0.701103  | 0.000035  |
| N | -4.109363 | -0.608929 | 0.000011  |
| C | -5.306779 | -1.303128 | -0.000017 |
| C | -6.309578 | -0.379849 | -0.000037 |
| C | -6.414134 | 2.154692  | -0.000019 |
| H | -3.653054 | 1.496466  | 0.000074  |
| C | -2.765735 | -1.241048 | 0.000043  |
| H | -5.338016 | -2.381558 | -0.000033 |
| H | -7.382038 | -0.497734 | -0.000073 |
| H | -7.035361 | 2.228962  | 0.894616  |
| H | -5.678855 | 2.959521  | -0.000096 |
| H | -7.035461 | 2.228889  | -0.894590 |

|   |           |           |           |
|---|-----------|-----------|-----------|
| C | -1.619798 | -0.237100 | 0.000009  |
| H | -2.721625 | -1.881502 | 0.885841  |
| H | -2.721616 | -1.881572 | -0.885703 |
| C | -0.261627 | -0.952572 | 0.000015  |
| H | -1.688120 | 0.407725  | -0.886213 |
| H | -1.688103 | 0.407767  | 0.886202  |
| C | 0.916288  | 0.026909  | 0.000007  |
| H | -0.194887 | -1.606417 | -0.880108 |
| H | -0.194884 | -1.606404 | 0.880148  |
| C | 2.276487  | -0.676898 | -0.000010 |
| H | 0.844367  | 0.682375  | 0.879702  |
| H | 0.844351  | 0.682385  | -0.879678 |
| C | 3.457444  | 0.298162  | 0.000011  |
| H | 2.345464  | -1.333740 | -0.878915 |
| H | 2.345467  | -1.333778 | 0.878867  |
| C | 4.818696  | -0.403377 | -0.000030 |
| H | 3.386456  | 0.955374  | 0.878850  |
| H | 3.386437  | 0.955436  | -0.878781 |
| C | 6.001177  | 0.569441  | 0.000017  |
| H | 4.888134  | -1.061069 | -0.878643 |
| H | 4.888140  | -1.061161 | 0.878514  |
| C | 7.363331  | -0.131302 | -0.000043 |
| H | 5.931565  | 1.227500  | 0.878658  |
| H | 5.931545  | 1.227611  | -0.878540 |
| C | 8.538628  | 0.848568  | 0.000015  |
| H | 7.431141  | -0.788468 | -0.878280 |
| H | 7.431155  | -0.788592 | 0.878100  |
| H | 9.498996  | 0.321961  | -0.000035 |
| H | 8.512960  | 1.496216  | 0.884758  |
| H | 8.512939  | 1.496346  | -0.884632 |

**[NTf<sub>2</sub>]-**

-1827.64155887

|   |           |           |           |
|---|-----------|-----------|-----------|
| N | 0.033724  | -0.879627 | 0.779233  |
| S | -1.509528 | -0.868148 | 0.314040  |
| S | 1.290052  | -0.899007 | -0.238092 |
| O | -2.332126 | -1.035166 | 1.516948  |
| O | 2.281799  | -1.888040 | 0.201169  |
| C | -1.851370 | 0.899837  | -0.190755 |
| C | 2.075753  | 0.734116  | 0.208951  |
| F | -3.169651 | 1.058397  | -0.412947 |
| F | -1.488959 | 1.752361  | 0.780848  |
| F | -1.197601 | 1.233269  | -1.309859 |
| F | 1.247562  | 1.758112  | -0.050227 |
| F | 3.193810  | 0.908097  | -0.520004 |
| F | 2.412679  | 0.781344  | 1.505054  |
| O | -1.827114 | -1.651218 | -0.885435 |
| O | 0.996028  | -0.775087 | -1.672025 |

**(tBu)<sub>3</sub>P/B(C<sub>6</sub>F<sub>5</sub>)<sub>3</sub>**

-3024.12056353

|   |           |           |          |
|---|-----------|-----------|----------|
| P | -0.020673 | 0.061257  | 2.381006 |
| C | -0.247598 | 1.863589  | 3.059798 |
| C | 1.629800  | -0.621475 | 3.136185 |
| C | -1.461149 | -1.004671 | 3.122655 |
| C | 2.031939  | -1.850661 | 2.290257 |
| H | 3.018059  | -2.203499 | 2.620438 |

|   |           |           |           |
|---|-----------|-----------|-----------|
| H | 1.336904  | -2.683727 | 2.384270  |
| H | 2.101518  | -1.596392 | 1.230327  |
| C | 1.604816  | -1.021900 | 4.621805  |
| H | 2.608756  | -1.353884 | 4.920425  |
| H | 1.328001  | -0.190157 | 5.272695  |
| H | 0.922223  | -1.849387 | 4.821383  |
| C | 2.765892  | 0.404534  | 2.946778  |
| H | 3.717878  | -0.082265 | 3.195473  |
| H | 2.841127  | 0.762048  | 1.919588  |
| H | 2.668967  | 1.270212  | 3.603838  |
| C | -1.135399 | -2.506494 | 2.987534  |
| H | -0.361177 | -2.837221 | 3.681669  |
| H | -2.041741 | -3.080184 | 3.220690  |
| H | -0.827979 | -2.779094 | 1.977624  |
| C | -2.698382 | -0.765087 | 2.228170  |
| H | -3.507990 | -1.431941 | 2.553517  |
| H | -3.074227 | 0.255863  | 2.277550  |
| H | -2.478121 | -0.986140 | 1.181390  |
| C | -1.843079 | -0.738385 | 4.589466  |
| H | -2.640408 | -1.434556 | 4.884423  |
| H | -1.005008 | -0.892114 | 5.272000  |
| H | -2.226347 | 0.271237  | 4.746819  |
| C | 0.125550  | 2.106440  | 4.532935  |
| H | -0.085323 | 3.154290  | 4.787838  |
| H | -0.451130 | 1.481079  | 5.217479  |
| H | 1.185223  | 1.936892  | 4.730884  |
| C | -1.706157 | 2.325964  | 2.863886  |
| H | -2.400313 | 1.841196  | 3.552099  |
| H | -1.757990 | 3.404352  | 3.062110  |
| H | -2.064783 | 2.164221  | 1.847104  |
| C | 0.607789  | 2.789057  | 2.165028  |
| H | 1.677545  | 2.604417  | 2.252673  |
| H | 0.338695  | 2.681694  | 1.111742  |
| H | 0.427169  | 3.832277  | 2.456701  |
| B | 0.013777  | -0.038041 | -1.447665 |
| C | -1.111618 | -1.128117 | -1.458253 |
| C | -0.983423 | -2.344625 | -0.775063 |
| C | -1.998883 | -3.287370 | -0.695305 |
| C | -3.202824 | -3.049132 | -1.352760 |
| C | -3.369074 | -1.872724 | -2.078911 |
| C | -2.335350 | -0.944586 | -2.117915 |
| F | 0.148186  | -2.639781 | -0.113378 |
| F | -1.831636 | -4.409983 | 0.012456  |
| F | -4.186415 | -3.945318 | -1.294712 |
| F | -4.515597 | -1.647309 | -2.728472 |
| F | -2.557202 | 0.164630  | -2.841638 |
| C | 1.520235  | -0.467738 | -1.450415 |
| C | 2.514296  | 0.281587  | -0.807472 |
| C | 3.840323  | -0.119341 | -0.724556 |
| C | 4.232357  | -1.306791 | -1.336806 |
| C | 3.291370  | -2.071587 | -2.021244 |
| C | 1.969121  | -1.645569 | -2.064848 |
| F | 2.206532  | 1.433581  | -0.188136 |
| F | 1.114135  | -2.423700 | -2.748001 |
| F | 3.666179  | -3.202650 | -2.627417 |
| F | 5.502006  | -1.704381 | -1.275011 |
| F | 4.734378  | 0.617493  | -0.056073 |

|   |           |          |           |
|---|-----------|----------|-----------|
| C | -0.368033 | 1.480400 | -1.509362 |
| C | -1.509058 | 1.992104 | -0.877668 |
| C | -1.823997 | 3.343312 | -0.845115 |
| C | -0.996199 | 4.251580 | -1.499498 |
| C | 0.130869  | 3.791871 | -2.175660 |
| C | 0.422393  | 2.432932 | -2.168318 |
| F | -2.348825 | 1.175035 | -0.220037 |
| F | -2.903776 | 3.775373 | -0.184316 |
| F | -1.285575 | 5.551569 | -1.485876 |
| F | 0.918434  | 4.657146 | -2.822417 |
| F | 1.518345  | 2.054900 | -2.846022 |

**toluene/toluene**

-543.309761428

|   |           |           |           |
|---|-----------|-----------|-----------|
| C | -1.505816 | 0.771527  | -0.781819 |
| C | -1.182086 | -0.478984 | -1.322330 |
| C | -1.554903 | -1.655295 | -0.677642 |
| C | -2.258441 | -1.604022 | 0.527394  |
| C | -2.585485 | -0.365670 | 1.078092  |
| C | -2.213300 | 0.810620  | 0.424440  |
| H | -0.611085 | -0.528510 | -2.245607 |
| H | -1.282567 | -2.614664 | -1.108652 |
| H | -2.544574 | -2.521692 | 1.033883  |
| H | -3.131883 | -0.312116 | 2.016101  |
| H | -2.474186 | 1.773999  | 0.856863  |
| C | -1.098362 | 2.039285  | -1.490476 |
| H | -0.036730 | 2.010905  | -1.758945 |
| H | -1.667288 | 2.179739  | -2.418395 |
| H | -1.266158 | 2.919740  | -0.862267 |
| C | 1.506131  | 0.771333  | 0.781491  |
| C | 2.214228  | 0.809624  | -0.424446 |
| C | 2.585894  | -0.367111 | -1.077606 |
| C | 2.257684  | -1.605114 | -0.526781 |
| C | 1.553476  | -1.655572 | 0.677883  |
| C | 1.181238  | -0.478824 | 1.322119  |
| H | 2.476144  | 1.772671  | -0.857024 |
| H | 3.132808  | -0.314158 | -2.015349 |
| H | 2.543372  | -2.523113 | -1.032926 |
| H | 1.280188  | -2.614627 | 1.108989  |
| H | 0.609820  | -0.527721 | 2.245169  |
| C | 1.099427  | 2.039531  | 1.489797  |
| H | 1.670479  | 2.181252  | 2.416233  |
| H | 1.265065  | 2.919573  | 0.860448  |
| H | 0.038487  | 2.010751  | 1.760789  |

**toluene/(tBu)<sub>3</sub>P**

-1086.74720390

|   |           |           |           |
|---|-----------|-----------|-----------|
| P | -1.027929 | 0.031380  | 0.269299  |
| C | -0.463705 | -1.427108 | -0.870298 |
| C | -1.251205 | 1.580455  | -0.869150 |
| C | -2.774893 | -0.422130 | 0.965428  |
| C | -2.070730 | 2.653040  | -0.124821 |
| H | -2.011371 | 3.594175  | -0.687164 |
| H | -3.128030 | 2.396559  | -0.036884 |
| H | -1.673566 | 2.843935  | 0.877428  |
| C | -1.892323 | 1.357323  | -2.248799 |

|   |           |           |           |
|---|-----------|-----------|-----------|
| H | -1.983969 | 2.321666  | -2.768201 |
| H | -1.290074 | 0.706558  | -2.885410 |
| H | -2.894190 | 0.927452  | -2.178330 |
| C | 0.154218  | 2.197687  | -1.050728 |
| H | 0.065870  | 3.129351  | -1.626205 |
| H | 0.597563  | 2.441695  | -0.081245 |
| H | 0.851794  | 1.549060  | -1.577721 |
| C | -3.026298 | 0.511478  | 2.171812  |
| H | -3.153152 | 1.556186  | 1.889906  |
| H | -3.944976 | 0.196882  | 2.685123  |
| H | -2.201833 | 0.454386  | 2.890150  |
| C | -2.726174 | -1.846244 | 1.554659  |
| H | -3.640186 | -2.018249 | 2.138078  |
| H | -2.683395 | -2.620812 | 0.786830  |
| H | -1.874240 | -1.978081 | 2.229657  |
| C | -3.969981 | -0.341277 | 0.000959  |
| H | -4.883800 | -0.655812 | 0.524691  |
| H | -4.142875 | 0.673547  | -0.363410 |
| H | -3.846786 | -0.995361 | -0.865081 |
| C | -1.527200 | -2.056311 | -1.784856 |
| H | -1.059190 | -2.837382 | -2.400246 |
| H | -2.332403 | -2.532482 | -1.220562 |
| H | -1.976559 | -1.327658 | -2.463126 |
| C | 0.120136  | -2.516798 | 0.057881  |
| H | -0.626380 | -2.983707 | 0.699698  |
| H | 0.563810  | -3.309627 | -0.559515 |
| H | 0.911024  | -2.104671 | 0.690219  |
| C | 0.722070  | -0.960601 | -1.739501 |
| H | 0.424205  | -0.277263 | -2.537191 |
| H | 1.502544  | -0.484800 | -1.141391 |
| H | 1.170889  | -1.840085 | -2.219315 |
| C | 2.957395  | 0.702139  | 1.212240  |
| C | 3.481319  | 1.300312  | 0.060368  |
| C | 4.192786  | 0.552699  | -0.879955 |
| C | 4.397081  | -0.812572 | -0.680533 |
| C | 3.885910  | -1.421316 | 0.467135  |
| C | 3.175115  | -0.669397 | 1.401623  |
| H | 3.327293  | 2.363999  | -0.102660 |
| H | 4.588397  | 1.039403  | -1.767409 |
| H | 4.949841  | -1.396845 | -1.410674 |
| H | 4.038708  | -2.484116 | 0.634184  |
| H | 2.779152  | -1.150682 | 2.292775  |
| C | 2.149393  | 1.493508  | 2.208880  |
| H | 2.294876  | 2.570737  | 2.077683  |
| H | 1.081037  | 1.275054  | 2.082727  |
| H | 2.421424  | 1.236964  | 3.239045  |

**toluene/B(C<sub>6</sub>F<sub>5</sub>)<sub>3</sub>**

-2480.67625992

|   |           |           |           |
|---|-----------|-----------|-----------|
| B | -0.192228 | 0.070387  | -0.708275 |
| C | 1.345484  | -0.080360 | -0.910769 |
| C | 2.264906  | 0.842088  | -0.382306 |
| C | 3.640097  | 0.653279  | -0.428363 |
| C | 4.155362  | -0.464928 | -1.074799 |
| C | 3.288939  | -1.382388 | -1.666454 |
| C | 1.919515  | -1.177556 | -1.576083 |
| F | 1.849760  | 1.957775  | 0.230164  |



|   |           |           |           |
|---|-----------|-----------|-----------|
| F | 4.467670  | 1.534940  | 0.143996  |
| F | 5.471709  | -0.655085 | -1.136582 |
| F | 3.783774  | -2.443245 | -2.312268 |
| F | 1.140559  | -2.086796 | -2.181500 |
| C | -0.826817 | 1.487691  | -0.499408 |
| C | -1.814875 | 1.727084  | 0.461347  |
| C | -2.362366 | 2.983417  | 0.687955  |
| C | -1.947811 | 4.056642  | -0.097154 |
| C | -0.982376 | 3.863053  | -1.082859 |
| C | -0.440208 | 2.596449  | -1.260123 |
| F | -2.260237 | 0.726465  | 1.245820  |
| F | 0.489989  | 2.458169  | -2.219168 |
| F | -0.587766 | 4.891373  | -1.840420 |
| F | -2.471788 | 5.266516  | 0.096139  |
| F | -3.282932 | 3.168043  | 1.640262  |
| C | -1.142615 | -1.173622 | -0.667752 |
| C | -0.775601 | -2.399853 | -0.097203 |
| C | -1.655686 | -3.463193 | 0.052440  |
| C | -2.958685 | -3.344931 | -0.421651 |
| C | -3.363992 | -2.160285 | -1.032340 |
| C | -2.464914 | -1.105875 | -1.134153 |
| F | 0.461012  | -2.587270 | 0.386606  |
| F | -1.263738 | -4.584506 | 0.668394  |
| F | -3.812518 | -4.358933 | -0.295386 |
| F | -4.609436 | -2.046760 | -1.504233 |
| F | -2.917170 | 0.009306  | -1.730497 |
| C | 0.414035  | -0.944287 | 3.038910  |
| C | 1.689508  | -1.494054 | 2.865331  |
| C | 2.817675  | -0.677651 | 2.782263  |
| C | 2.690036  | 0.708291  | 2.876909  |
| C | 1.422981  | 1.269242  | 3.045563  |
| C | 0.297183  | 0.450923  | 3.120726  |
| H | 1.797133  | -2.572333 | 2.786900  |
| H | 3.797940  | -1.125393 | 2.641302  |
| H | 3.564593  | 1.346100  | 2.792320  |
| H | 1.310254  | 2.348073  | 3.102533  |
| H | -0.686807 | 0.894003  | 3.245486  |
| C | -0.805109 | -1.824903 | 3.169591  |
| H | -0.621274 | -2.826752 | 2.771143  |
| H | -1.097717 | -1.937591 | 4.221338  |
| H | -1.660979 | -1.393602 | 2.640697  |

**[C<sub>10min</sub>][NTf<sub>2</sub>]**

-2487.04611366

|   |          |          |           |
|---|----------|----------|-----------|
| N | 3.672586 | 2.176459 | -1.186281 |
| C | 2.344725 | 2.264728 | -1.046544 |
| N | 2.077408 | 2.932227 | 0.080122  |
| C | 3.276083 | 3.272937 | 0.685395  |
| C | 4.275449 | 2.797971 | -0.106411 |
| C | 4.346698 | 1.334853 | -2.178523 |
| H | 1.633336 | 1.793390 | -1.707042 |
| C | 0.749087 | 3.058555 | 0.716331  |
| H | 3.304411 | 3.782998 | 1.634107  |
| H | 5.346059 | 2.813494 | 0.014749  |
| H | 4.681969 | 0.422331 | -1.680820 |
| H | 3.629004 | 1.073633 | -2.955475 |
| H | 5.187721 | 1.882857 | -2.607544 |

|   |            |           |           |
|---|------------|-----------|-----------|
| C | -0.367212  | 2.453698  | -0.126645 |
| H | 0.831821   | 2.519415  | 1.663332  |
| H | 0.577623   | 4.121350  | 0.916672  |
| C | -1.696731  | 2.433765  | 0.633647  |
| H | -0.480310  | 3.008982  | -1.067543 |
| H | -0.096313  | 1.423190  | -0.371038 |
| C | -2.784023  | 1.683951  | -0.142466 |
| H | -2.030873  | 3.458155  | 0.852526  |
| H | -1.544001  | 1.939977  | 1.603126  |
| C | -4.110977  | 1.591200  | 0.614933  |
| H | -2.420879  | 0.672932  | -0.371269 |
| H | -2.948527  | 2.176659  | -1.111692 |
| C | -5.187190  | 0.812806  | -0.147287 |
| H | -4.479942  | 2.603714  | 0.835673  |
| H | -3.938070  | 1.110772  | 1.588848  |
| C | -6.511347  | 0.704260  | 0.614171  |
| H | -4.812299  | -0.196285 | -0.371205 |
| H | -5.364664  | 1.293637  | -1.120365 |
| C | -7.585574  | -0.082491 | -0.142092 |
| H | -6.888104  | 1.713799  | 0.835396  |
| H | -6.330877  | 0.227473  | 1.588698  |
| C | -8.909054  | -0.194315 | 0.621077  |
| H | -7.208322  | -1.091610 | -0.363744 |
| H | -7.767959  | 0.393726  | -1.116768 |
| C | -9.975235  | -0.984555 | -0.141417 |
| H | -9.285673  | 0.814604  | 0.841087  |
| H | -8.724995  | -0.669294 | 1.594915  |
| H | -10.910925 | -1.048692 | 0.425282  |
| H | -9.636746  | -2.007784 | -0.344974 |
| H | -10.200107 | -0.513610 | -1.106195 |
| N | 1.462968   | -0.341502 | 0.003290  |
| S | 2.616555   | -0.366440 | 1.133067  |
| S | 1.581659   | -1.064051 | -1.440851 |
| O | 2.216254   | 0.602936  | 2.162442  |
| O | 1.225929   | -0.079629 | -2.486664 |
| C | 2.459788   | -2.030794 | 1.965177  |
| C | 0.096976   | -2.187635 | -1.347705 |
| F | 3.324931   | -2.096119 | 2.981768  |
| F | 1.218599   | -2.183716 | 2.435509  |
| F | 2.722282   | -3.011418 | 1.099995  |
| F | 0.228161   | -3.028813 | -0.319333 |
| F | 0.000666   | -2.886750 | -2.480749 |
| F | -1.019767  | -1.466713 | -1.184158 |
| O | 3.989161   | -0.313837 | 0.609018  |
| O | 2.745264   | -1.923731 | -1.669954 |

**[C<sub>10</sub>min]/B(C<sub>6</sub>F<sub>5</sub>)<sub>3</sub>**  
-2868.28964827

|   |           |           |          |
|---|-----------|-----------|----------|
| N | -3.196160 | -2.184073 | 2.567930 |
| C | -1.906646 | -1.941419 | 2.307868 |
| N | -1.582573 | -0.748879 | 2.820333 |
| C | -2.707136 | -0.210647 | 3.420125 |
| C | -3.720367 | -1.109569 | 3.262591 |
| C | -3.945818 | -3.336658 | 2.058443 |
| H | -1.253314 | -2.600984 | 1.763673 |
| C | -0.306839 | -0.033422 | 2.588997 |
| H | -2.688168 | 0.756781  | 3.896094 |

|   |           |           |           |
|---|-----------|-----------|-----------|
| H | -4.752519 | -1.075351 | 3.572620  |
| H | -4.694365 | -2.973073 | 1.351130  |
| H | -3.252922 | -4.004553 | 1.546056  |
| H | -4.426156 | -3.864379 | 2.883720  |
| C | 0.940892  | -0.900096 | 2.761357  |
| H | -0.364020 | 0.380837  | 1.579638  |
| H | -0.294062 | 0.809031  | 3.282808  |
| C | 2.114551  | -0.250789 | 2.019758  |
| H | 1.158489  | -1.030544 | 3.827307  |
| H | 0.778345  | -1.896699 | 2.339828  |
| C | 3.480089  | -0.891415 | 2.275325  |
| H | 2.168960  | 0.819638  | 2.263601  |
| H | 1.897175  | -0.311177 | 0.947539  |
| C | 4.528331  | -0.338673 | 1.304589  |
| H | 3.409041  | -1.981906 | 2.159829  |
| H | 3.791225  | -0.708392 | 3.312327  |
| C | 5.953625  | -0.836425 | 1.543953  |
| H | 4.517243  | 0.760177  | 1.347622  |
| H | 4.229831  | -0.607136 | 0.280457  |
| C | 6.946455  | -0.278856 | 0.519298  |
| H | 5.969179  | -1.935018 | 1.510128  |
| H | 6.275773  | -0.557442 | 2.556941  |
| C | 8.382802  | -0.760452 | 0.736880  |
| H | 6.920428  | 0.819960  | 0.551588  |
| H | 6.616943  | -0.557937 | -0.492514 |
| C | 9.375043  | -0.188119 | -0.279725 |
| H | 8.409681  | -1.858866 | 0.692324  |
| H | 8.707935  | -0.490558 | 1.752117  |
| C | 10.808271 | -0.673344 | -0.053120 |
| H | 9.346211  | 0.909396  | -0.233309 |
| H | 9.049958  | -0.458402 | -1.294050 |
| H | 11.496862 | -0.246518 | -0.789931 |
| H | 10.873391 | -1.765245 | -0.128867 |
| H | 11.167984 | -0.389344 | 0.943017  |
| B | -1.108814 | 0.568508  | -1.174340 |
| C | -2.198367 | 1.525377  | -0.596503 |
| C | -2.174966 | 2.916450  | -0.791154 |
| C | -3.122428 | 3.775994  | -0.245444 |
| C | -4.146176 | 3.250725  | 0.544545  |
| C | -4.212122 | 1.875728  | 0.765274  |
| C | -3.266748 | 1.049664  | 0.178755  |
| F | -1.214190 | 3.465664  | -1.539584 |
| F | -3.061330 | 5.086223  | -0.463383 |
| F | -5.048473 | 4.053449  | 1.090469  |
| F | -5.176946 | 1.358724  | 1.537524  |
| F | -3.392148 | -0.270930 | 0.448183  |
| C | 0.396336  | 0.930656  | -1.238671 |
| C | 1.273264  | 0.275767  | -2.123822 |
| C | 2.640047  | 0.525301  | -2.158955 |
| C | 3.185575  | 1.456846  | -1.275779 |
| C | 2.361182  | 2.122306  | -0.369483 |
| C | 1.001279  | 1.860560  | -0.375544 |
| F | 0.799749  | -0.625489 | -2.991869 |
| F | 0.274955  | 2.464064  | 0.586949  |
| F | 2.895701  | 2.936561  | 0.542592  |
| F | 4.491787  | 1.673688  | -1.264282 |
| F | 3.431433  | -0.120257 | -3.011170 |

|   |           |           |           |
|---|-----------|-----------|-----------|
| C | -1.594683 | -0.883020 | -1.527908 |
| C | -2.738837 | -1.108715 | -2.298305 |
| C | -3.359235 | -2.350308 | -2.387558 |
| C | -2.850716 | -3.414930 | -1.641649 |
| C | -1.704396 | -3.229358 | -0.874066 |
| C | -1.077641 | -1.991066 | -0.866820 |
| F | -3.298659 | -0.082301 | -2.953301 |
| F | -4.452473 | -2.520139 | -3.126377 |
| F | -3.465346 | -4.593975 | -1.642538 |
| F | -1.264078 | -4.217526 | -0.070403 |
| F | 0.014282  | -1.861393 | -0.072515 |

**(*t*Bu)<sub>3</sub>P/[NTf<sub>2</sub>]**

-2642.74189040

|   |           |           |           |
|---|-----------|-----------|-----------|
| P | -2.541284 | 0.132310  | -0.109326 |
| C | -4.391861 | 0.605187  | -0.460212 |
| C | -2.424124 | -0.314185 | 1.769297  |
| C | -2.172376 | -1.484475 | -1.106513 |
| C | -1.135433 | -1.116513 | 2.031545  |
| H | -0.983720 | -1.177578 | 3.118144  |
| H | -1.181997 | -2.141427 | 1.659723  |
| H | -0.253281 | -0.634794 | 1.607571  |
| C | -3.604479 | -1.083409 | 2.385457  |
| H | -3.383942 | -1.293306 | 3.442143  |
| H | -4.541654 | -0.521536 | 2.358845  |
| H | -3.772338 | -2.043856 | 1.890333  |
| C | -2.220957 | 1.027017  | 2.512826  |
| H | -2.079036 | 0.820924  | 3.583054  |
| H | -1.323954 | 1.538580  | 2.150775  |
| H | -3.068502 | 1.708275  | 2.421380  |
| C | -0.633025 | -1.616803 | -1.161583 |
| H | -0.174242 | -1.845391 | -0.202535 |
| H | -0.369870 | -2.431221 | -1.851506 |
| H | -0.168612 | -0.698530 | -1.528927 |
| C | -2.623758 | -1.289904 | -2.566999 |
| H | -2.217584 | -2.111552 | -3.172562 |
| H | -3.710045 | -1.307640 | -2.685788 |
| H | -2.240947 | -0.353110 | -2.985260 |
| C | -2.783524 | -2.795577 | -0.586101 |
| H | -2.492396 | -3.622884 | -1.250164 |
| H | -2.425897 | -3.046134 | 0.413881  |
| H | -3.876261 | -2.763957 | -0.558792 |
| C | -5.433149 | -0.524863 | -0.495027 |
| H | -6.435668 | -0.101929 | -0.662573 |
| H | -5.243401 | -1.232120 | -1.305864 |
| H | -5.464305 | -1.087039 | 0.440737  |
| C | -4.409683 | 1.349048  | -1.815991 |
| H | -4.187606 | 0.701968  | -2.664283 |
| H | -5.408754 | 1.777819  | -1.982474 |
| H | -3.682943 | 2.167850  | -1.819719 |
| C | -4.842736 | 1.655543  | 0.575095  |
| H | -4.978810 | 1.240036  | 1.574832  |
| H | -4.128528 | 2.482634  | 0.642066  |
| H | -5.809310 | 2.074297  | 0.260349  |
| N | 1.714272  | 0.117166  | 0.767417  |
| S | 2.758176  | -1.092084 | 0.956155  |
| S | 2.095686  | 1.685460  | 0.709190  |

|   |          |           |           |
|---|----------|-----------|-----------|
| O | 1.967370 | -2.309429 | 1.180664  |
| O | 1.168112 | 2.449411  | 1.553460  |
| C | 3.488744 | -1.363573 | -0.742894 |
| C | 1.542264 | 2.078970  | -1.029962 |
| F | 4.243858 | -2.476244 | -0.736730 |
| F | 2.521334 | -1.521825 | -1.660462 |
| F | 4.259634 | -0.334303 | -1.113205 |
| F | 2.186051 | 1.311199  | -1.923787 |
| F | 1.819043 | 3.365714  | -1.305173 |
| F | 0.227455 | 1.889056  | -1.181618 |
| O | 3.917197 | -0.822488 | 1.812097  |
| O | 3.523494 | 2.025210  | 0.724308  |
